# Supplementary material for: Highly efficient production of aromatics from C2H5Cl coupling with CO over H-zeolites
Source: Royal Society of Chemistry journal article supplement (doi:10.1039/d3cy01550e), 2024-01-01
Supplement: d3cy01550e1.pdf [file d3cy01550e1.pdf]

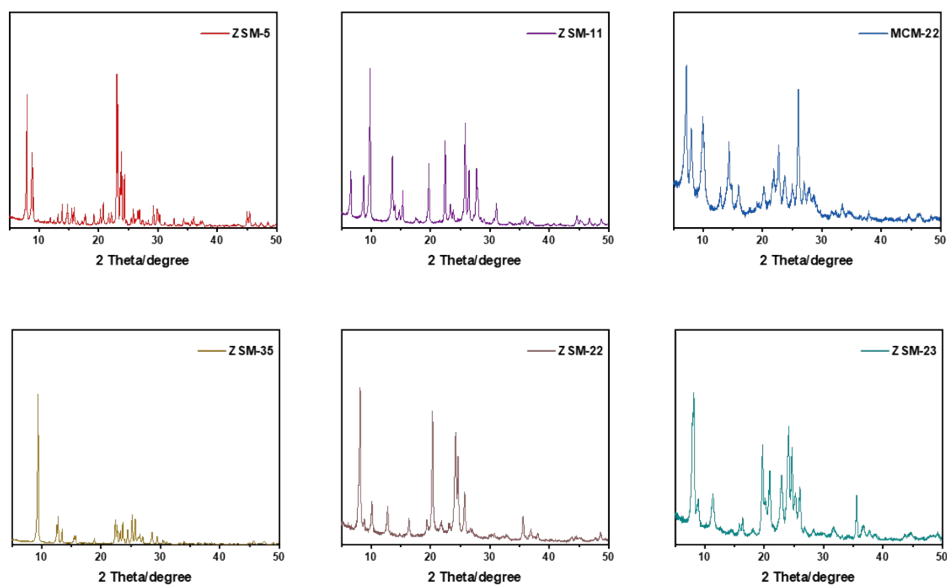

**Figure S1.** XRD of different zeolites.

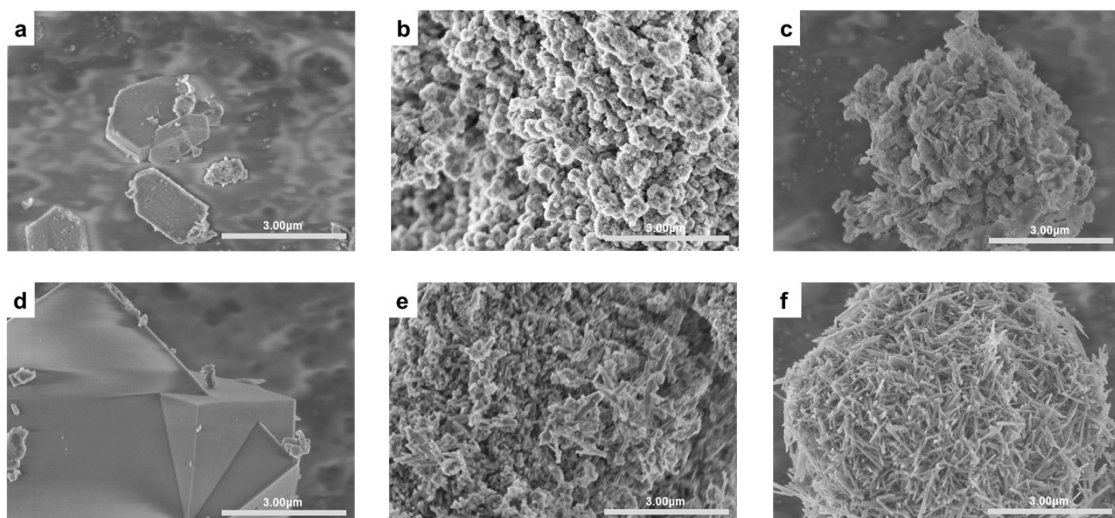

**Figure S2. SEM image of different zeolites.**

(a) ZSM-5 (b) ZSM-11 (c) MCM-22 (d) ZSM-35 (e) ZSM-22 (f) ZSM-23

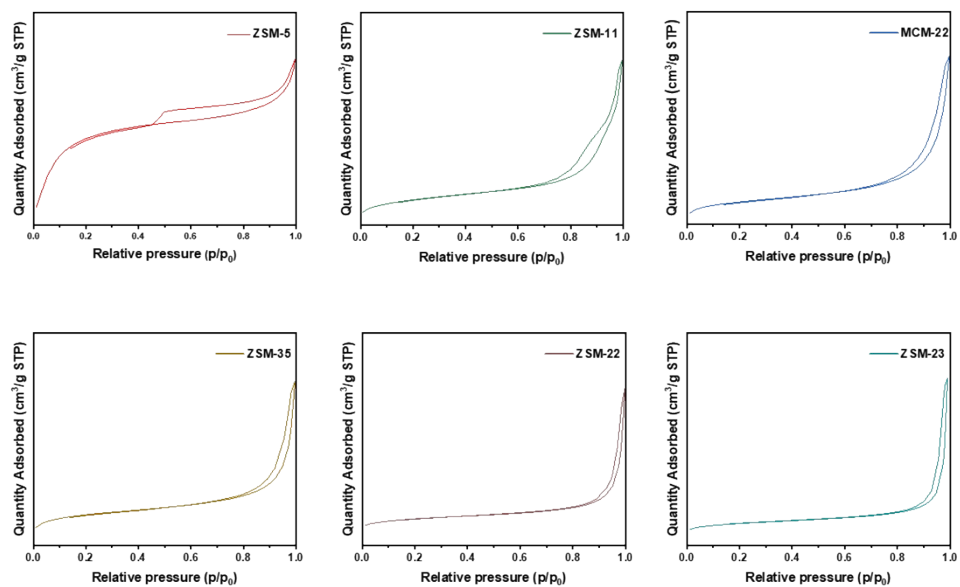

**Figure S3.** The N<sub>2</sub> adsorption-desorption isotherms of different zeolites.

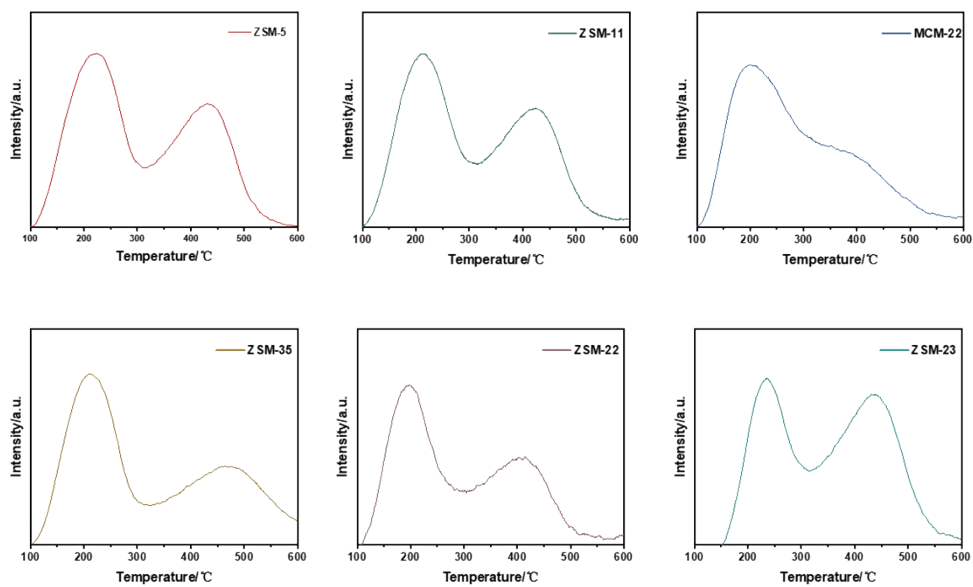

**Figure S4. NH<sub>3</sub>-TPD profiles of different zeolites.**

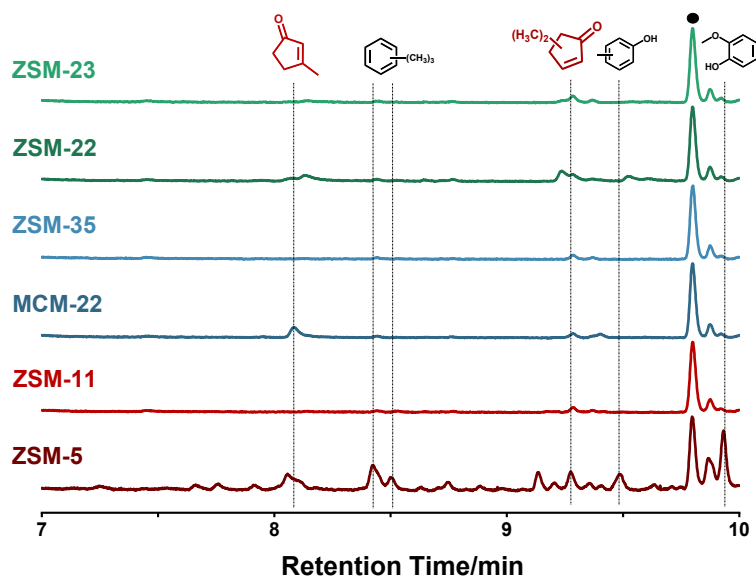

**Figure S13. GC-MS of organic materials retained in different spent zeolites.** Reaction conditions: 673K, P = 2 MPa, P(CO) = 1.13 MPa, P(C<sub>2</sub>H<sub>5</sub>Cl) = 9.57 kPa, WHSV = 0.1 g<sub>C<sub>2</sub>H<sub>5</sub>Cl</sub> g<sub>cat</sub><sup>-1</sup> h<sup>-1</sup>, Ar as balance gas.

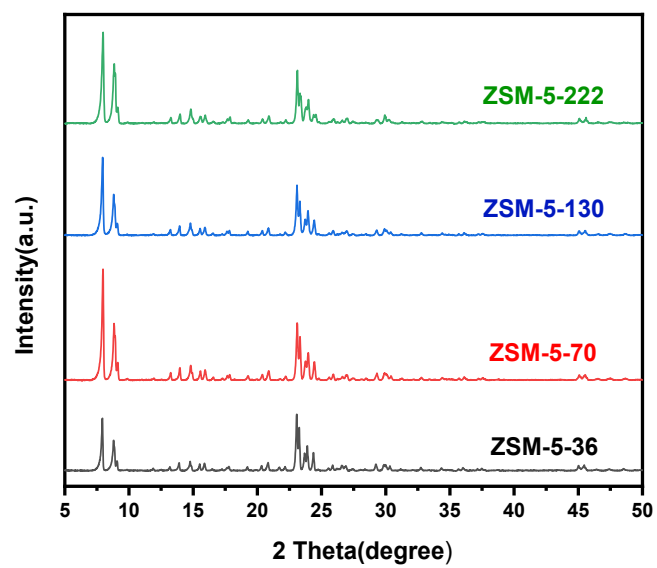

Figure S6. XRD of H-ZSM-5 with different SiO<sub>2</sub>/Al<sub>2</sub>O<sub>3</sub>.

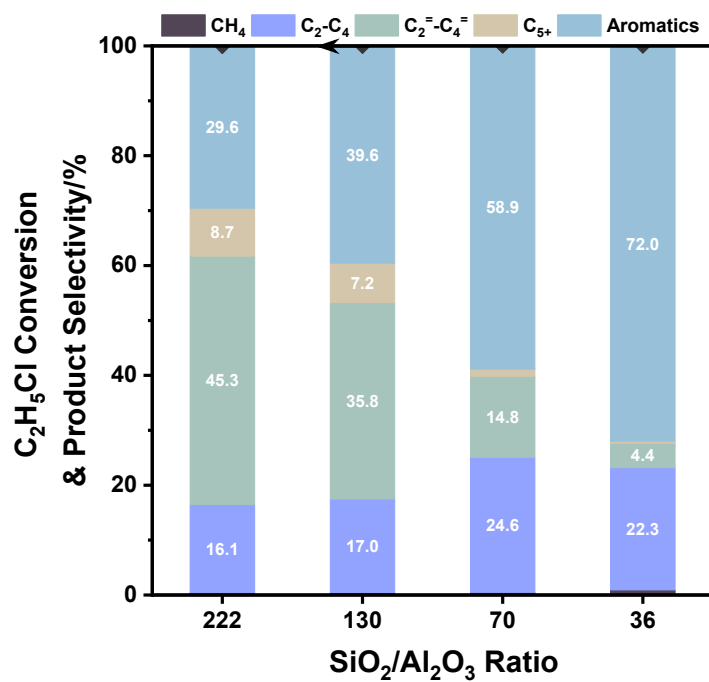

**Figure S7. Catalytic performances in C<sub>2</sub>H<sub>5</sub>Cl coupling CO to Aromatics reaction over H-ZSM-5 with different SiO<sub>2</sub>/Al<sub>2</sub>O<sub>3</sub>.** Reaction conditions: 673 K, P = 2 MPa, P(CO) = 1.13 MPa, P(C<sub>2</sub>H<sub>5</sub>Cl) = 9.57 kPa, WHSV = 0.1 g<sub>C<sub>2</sub>H<sub>5</sub>Cl</sub> g<sub>cat</sub><sup>-1</sup> h<sup>-1</sup>, Ar as balance gas.

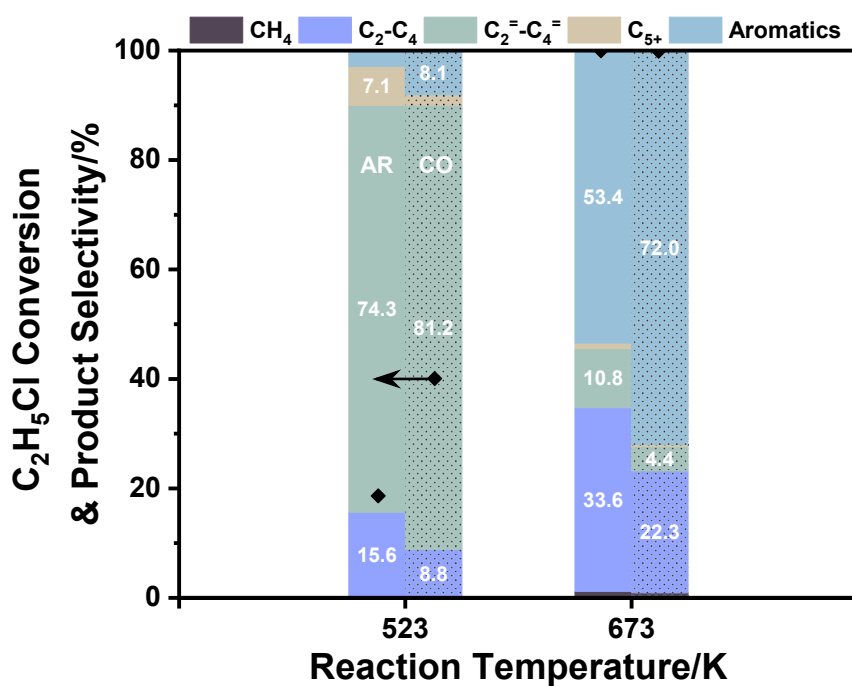

**Figure S8. Catalytic performance over H-ZSM5<sub>36</sub> with different temperature under Ar/ CO atmosphere.** Reaction conditions: 523/673 K, P = 2 MPa, P(CO) = 1.13 MPa /P(Ar) = 1.99 MPa, P(C<sub>2</sub>H<sub>5</sub>Cl) = 9.57 kPa, WHSV = 0.1 g<sub>C<sub>2</sub>H<sub>5</sub>Cl</sub> g<sub>cat</sub><sup>-1</sup> h<sup>-1</sup>, Ar as balance gas.



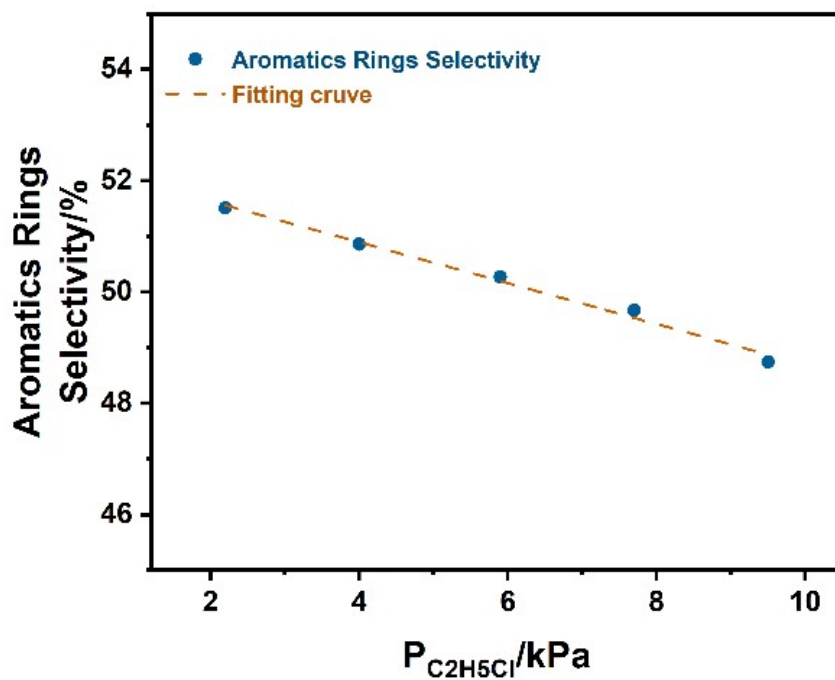

**Figure S9.** The C<sub>2</sub>H<sub>5</sub>Cl conversion, product selectivity at different C<sub>2</sub>H<sub>5</sub>Cl partial pressures. Reaction conditions: 673 K, P = 2.0 MPa, P(CO) = 1.13 MPa, P(C<sub>2</sub>H<sub>5</sub>Cl) = 2.2 - 9.57x10<sup>-3</sup> MPa, WHSV = 0.1 g<sub>C<sub>2</sub>H<sub>5</sub>Cl</sub> g<sub>cat</sub><sup>-1</sup> h<sup>-1</sup>, Ar as balance gas.

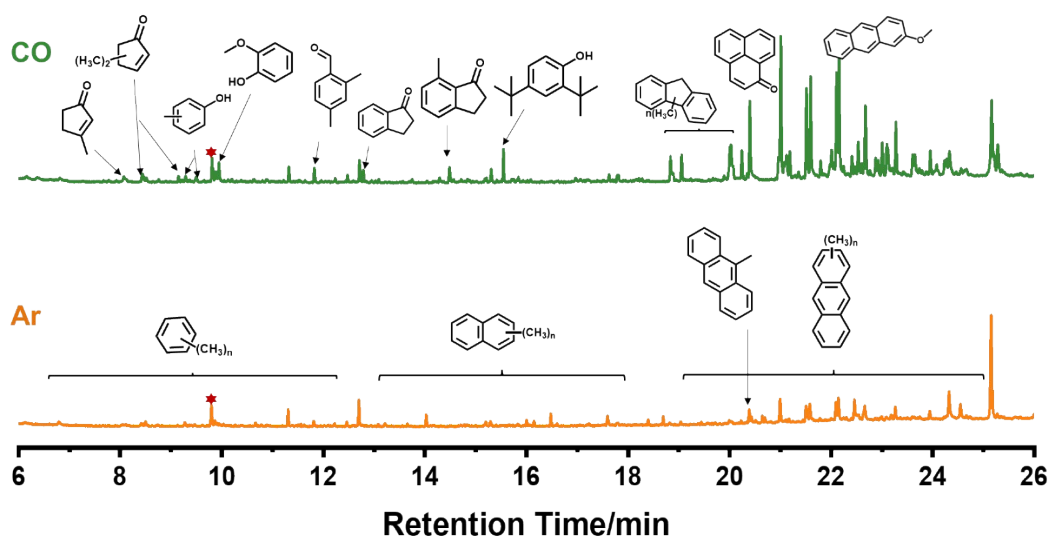

**Figure S10. GC-MS species retained in spent H-ZSM-5<sub>36</sub> under Ar or CO co-feeding.** Reaction conditions: 673K, P = 2 MPa, P(CO) = 1.13 MPa /P(Ar) = 1.99 MPa, P(C<sub>2</sub>H<sub>5</sub>Cl) = 9.57 kPa, WHSV = 0.1 g<sub>C<sub>2</sub>H<sub>5</sub>Cl</sub> g<sub>cat</sub><sup>-1</sup> h<sup>-1</sup>, Ar as balance gas.

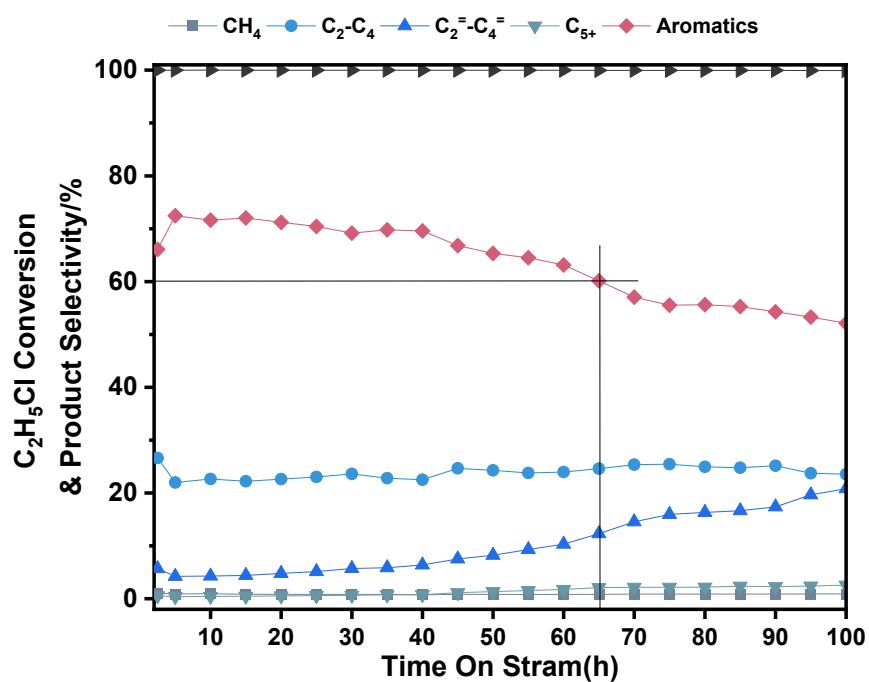

**Figure S11. Catalytic performance over HZSM-5<sub>36</sub>.** Reaction conditions: 673K, P = 2 MPa, P(CO) = 1.13 MPa, P(C<sub>2</sub>H<sub>5</sub>Cl) = 9.57x10<sup>-3</sup> MPa, WHSV = 0.1 g gcat<sup>-1</sup> h<sup>-1</sup>. Ar as balance gas.

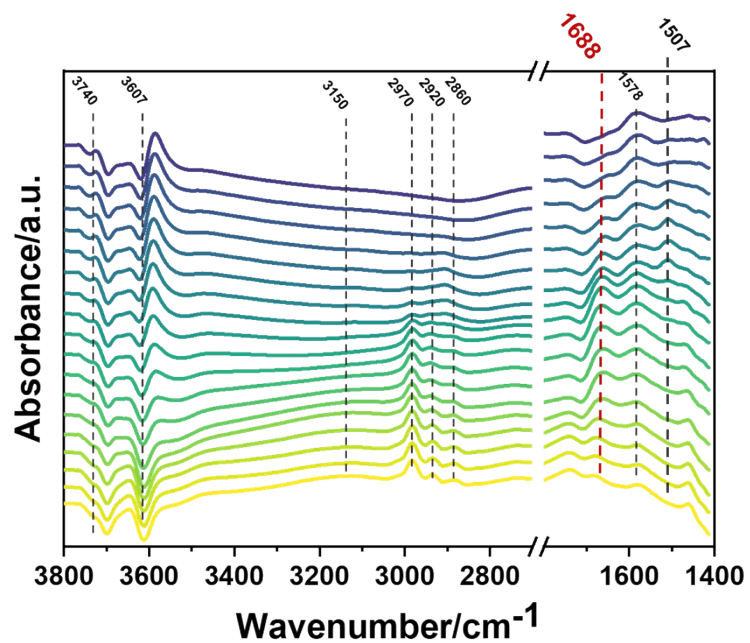

**Figure S12. Temperature-programmed in situ DRIFT characterization of C<sub>2</sub>H<sub>4</sub>+CO as feedstock over H-ZSM-5<sub>36</sub> under different atmospheres. Reaction conditions: CO/C<sub>2</sub>H<sub>4</sub>=6.8, 323 – 673 K, P = 0.1 MPa, Ar as balance gas.**

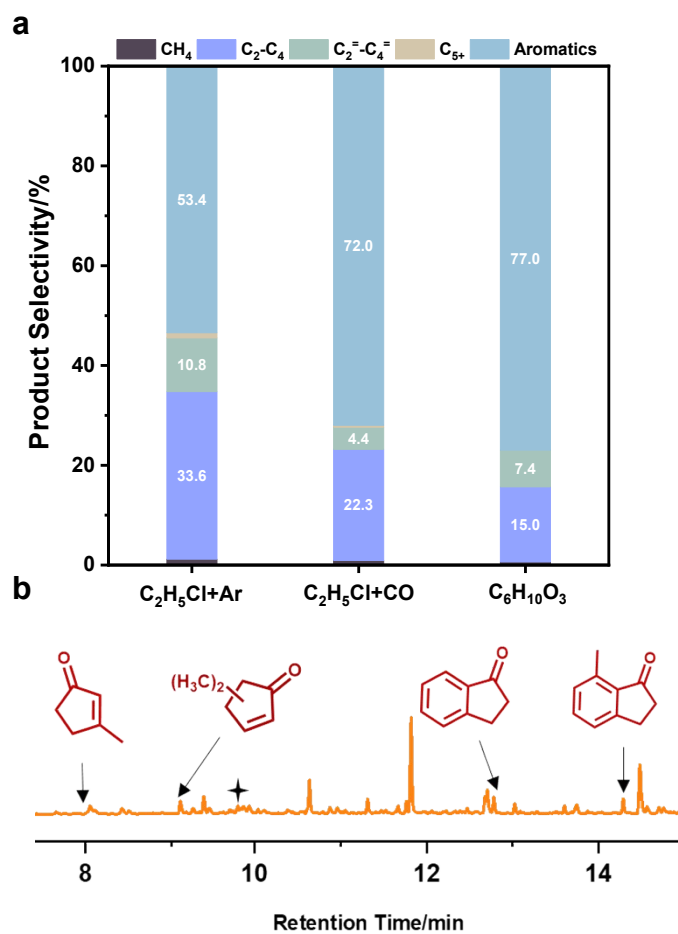

**Figure S13. Catalytic performance of maleic anhydride feed over HZSM-5<sub>36</sub>.** a) Product distribution. b) GC-MS of organic materials retained in spent H-ZSM-5<sub>36</sub>. Reaction conditions: 673K, P = 2 MPa, P(C<sub>6</sub>H<sub>10</sub>O<sub>3</sub>) = 9.57 kPa, WHSV = 0.1 g<sub>C<sub>2</sub>H<sub>5</sub>Cl</sub> or C<sub>6</sub>H<sub>10</sub>O<sub>3</sub> g<sub>cat</sub><sup>-1</sup> h<sup>-1</sup>. Ar as balance gas.

**Table S1.** Framework information and textural properties of zeolites with different topology obtained from the N<sub>2</sub> adsorption and desorption isotherms

| Topology | Type material | Channel dimensionality | SiO <sub>2</sub> /Al <sub>2</sub> O <sub>3</sub> mole ratio <sup>a</sup> | Surface area <sup>b</sup> (m <sup>2</sup> /g) | Pore volume <sup>c</sup> (cm <sup>3</sup> /g) | Strength acid concentration <sup>d</sup> (mmol/g STD) | Weak acid concentration <sup>d</sup> (mmol/g STD) |
|----------|---------------|------------------------|--------------------------------------------------------------------------|-----------------------------------------------|-----------------------------------------------|-------------------------------------------------------|---------------------------------------------------|
| MFI      | ZSM-5         | 3-dimensional          | 36                                                                       | 322.7                                         | 0.17                                          | 0.49                                                  | 0.60                                              |
| MEL      | ZSM-11        | 3-dimensional          | 36                                                                       | 306.1                                         | 0.30                                          | 0.34                                                  | 0.43                                              |
| MWW      | MCM-22        | 2-dimensional          | 39                                                                       | 362.6                                         | 0.37                                          | 0.07                                                  | 0.82                                              |
| FER      | ZSM-35        | 2-dimensional          | 29                                                                       | 326.5                                         | 0.26                                          | 0.32                                                  | 0.52                                              |
| TON      | ZSM-22        | 1-dimensional          | 38                                                                       | 109.0                                         | 0.11                                          | 0.13                                                  | 0.21                                              |
| MTT      | ZSM-23        | 1-dimensional          | 34                                                                       | 218.4                                         | 0.27                                          | 0.24                                                  | 0.12                                              |

a: measured by XRF; b: BET surface; c: Single-point pore volume at P/P<sub>0</sub>=0.975; d: measured by NH<sub>3</sub>-TPD

**Table S2.** The estimated aromatic ring selectivity obtained when C<sub>2</sub>H<sub>5</sub>Cl or C<sub>2</sub>H<sub>4</sub> was co-fed with CO.

| Feedstock                        | Aromatic rings selectivity/%  |                |                |                |                 |                  | total |
|----------------------------------|-------------------------------|----------------|----------------|----------------|-----------------|------------------|-------|
|                                  | C <sub>6</sub> H <sub>6</sub> | A <sub>7</sub> | A <sub>8</sub> | A <sub>9</sub> | A <sub>10</sub> | A <sub>10+</sub> |       |
| C <sub>2</sub> H <sub>5</sub> Cl | 8.47                          | 18.04          | 11.12          | 1.64           | 0.25            | 28.15            | 47.59 |
| C <sub>2</sub> H <sub>4</sub>    | 5.33                          | 15.11          | 13.39          | 2.22           | 0.47            | 35.95            | 48.05 |

Reaction conditions: 673 K, P = 2 MPa, P(CO) = 1130 kPa, P(C<sub>2</sub>H<sub>5</sub>Cl) = 9.57 kPa, WHSV = 0.1 g<sub>C<sub>2</sub>H<sub>5</sub>Cl</sub> g<sub>cat</sub><sup>-1</sup> h<sup>-1</sup>. Ar as balance gas.
